# Supplementary material for: Investigation of allosteric coupling in human β2-adrenergic receptor in the presence of intracellular loop 3
Source: PubMed Central journal article supplement (PMC4930610; doi:10.1186/s12900-016-0061-9), 2016-07-02

RMSD (Å)

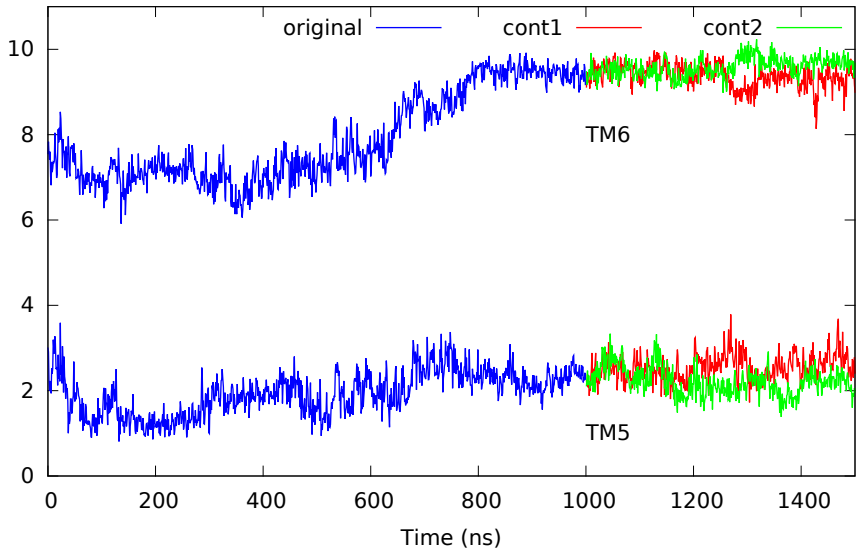

Supplement: 12900_2016_61_MOESM2_ESM.pdf [file 12900_2016_61_MOESM2_ESM.pdf]
